# Supplementary material for: Epidemiological Study of Return to Work and Mortality in Lung Cancer Survivors
Source: MDPI journal article supplement (doi:10.3390/ijerph19010309), 2021-12-28
Supplement: s1 [file s1]

Supplemental Table S1: The ICD-9-CM codes for clinical comorbidities

| Comorbidities                 | ICD-9-CM codes                                                                                                                                |
|-------------------------------|-----------------------------------------------------------------------------------------------------------------------------------------------|
| Disorders of lipid metabolism | ICD-9-CM codes, 272                                                                                                                           |
| Alcohol abuse                 | ICD-9-CM codes, 265.2, 291.1-291.3, 291.5-291.9, 303.0, 303.9, 305.0, 357.5, 425.5, 535.3, 571.0-571.3, 980.x, V11.3                          |
| Cerebrovascular diseases      | ICD-9-CM codes, 362.34, 430.x-438.x                                                                                                           |
| Chronic pulmonary diseases    | ICD-9-CM codes, 416.8, 416.9, 490.x-505.x, 506.4, 508.1, 508.8                                                                                |
| Peptic ulcer diseases         | ICD-9-CM codes, 531.x-534.x                                                                                                                   |
| Renal diseases                | ICD-9-CM codes, 403.01, 403.11, 403.91, 404.02, 404.03, 404.12, 404.13, 404.92, 404.93, 582.x, 583.0-583.7, 585.x, 586.x, V42.0, V45.1, V56.x |
| Liver diseases                | ICD-9-CM codes, 070.22, 070.23, 070.32, 070.33, 070.44, 070.54, 070.6, 070.9, 570.x, 571.x, 573.3, 573.4, 573.8, 573.9, V42.7                 |
| Depression                    | ICD-9-CM codes, 296.2, 296.3, 296.5, 300.4, 309.x, 311.x                                                                                      |
